# Supplementary material for: In search of the altering salivary proteome in metastatic breast and ovarian cancers
Source: PubMed Central journal article supplement (PMC6996400; doi:10.1096/fba.2018-00029), 2019-01-30

Figure 1A

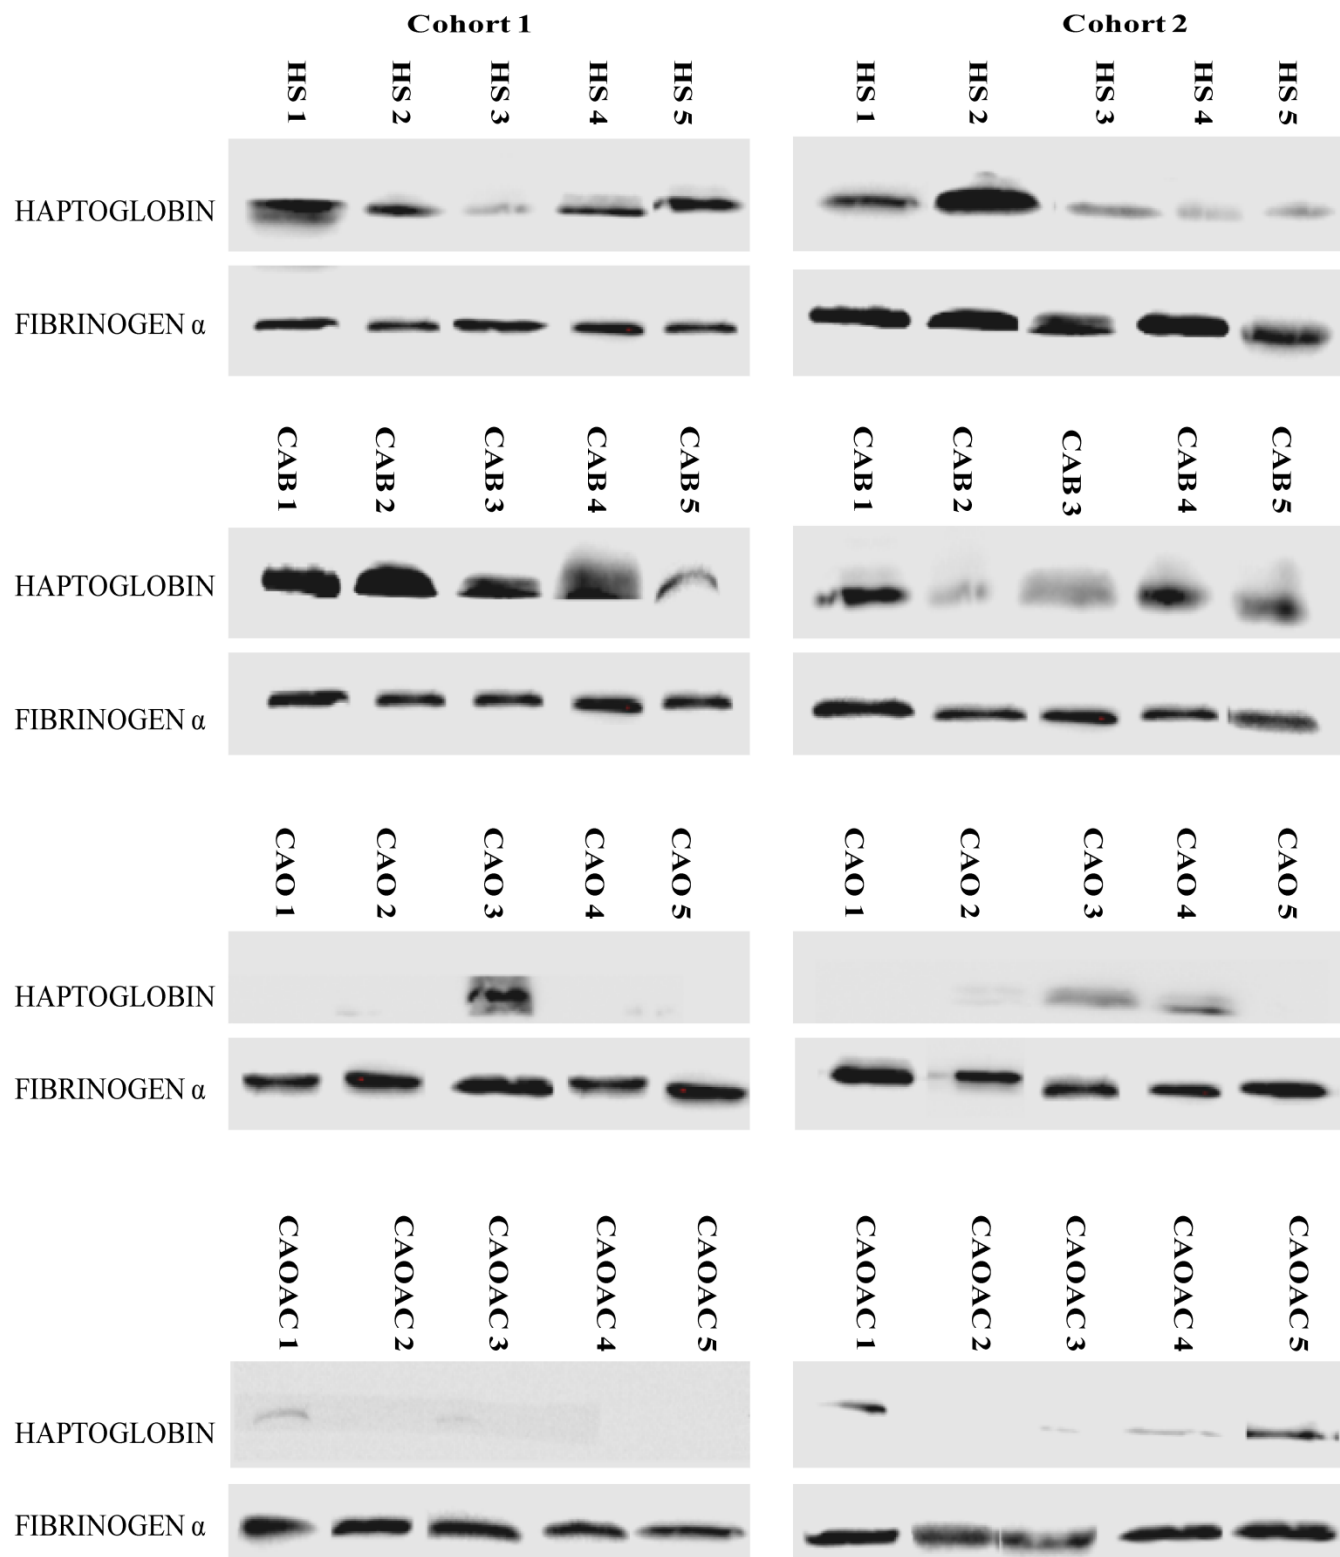



Figure 1C

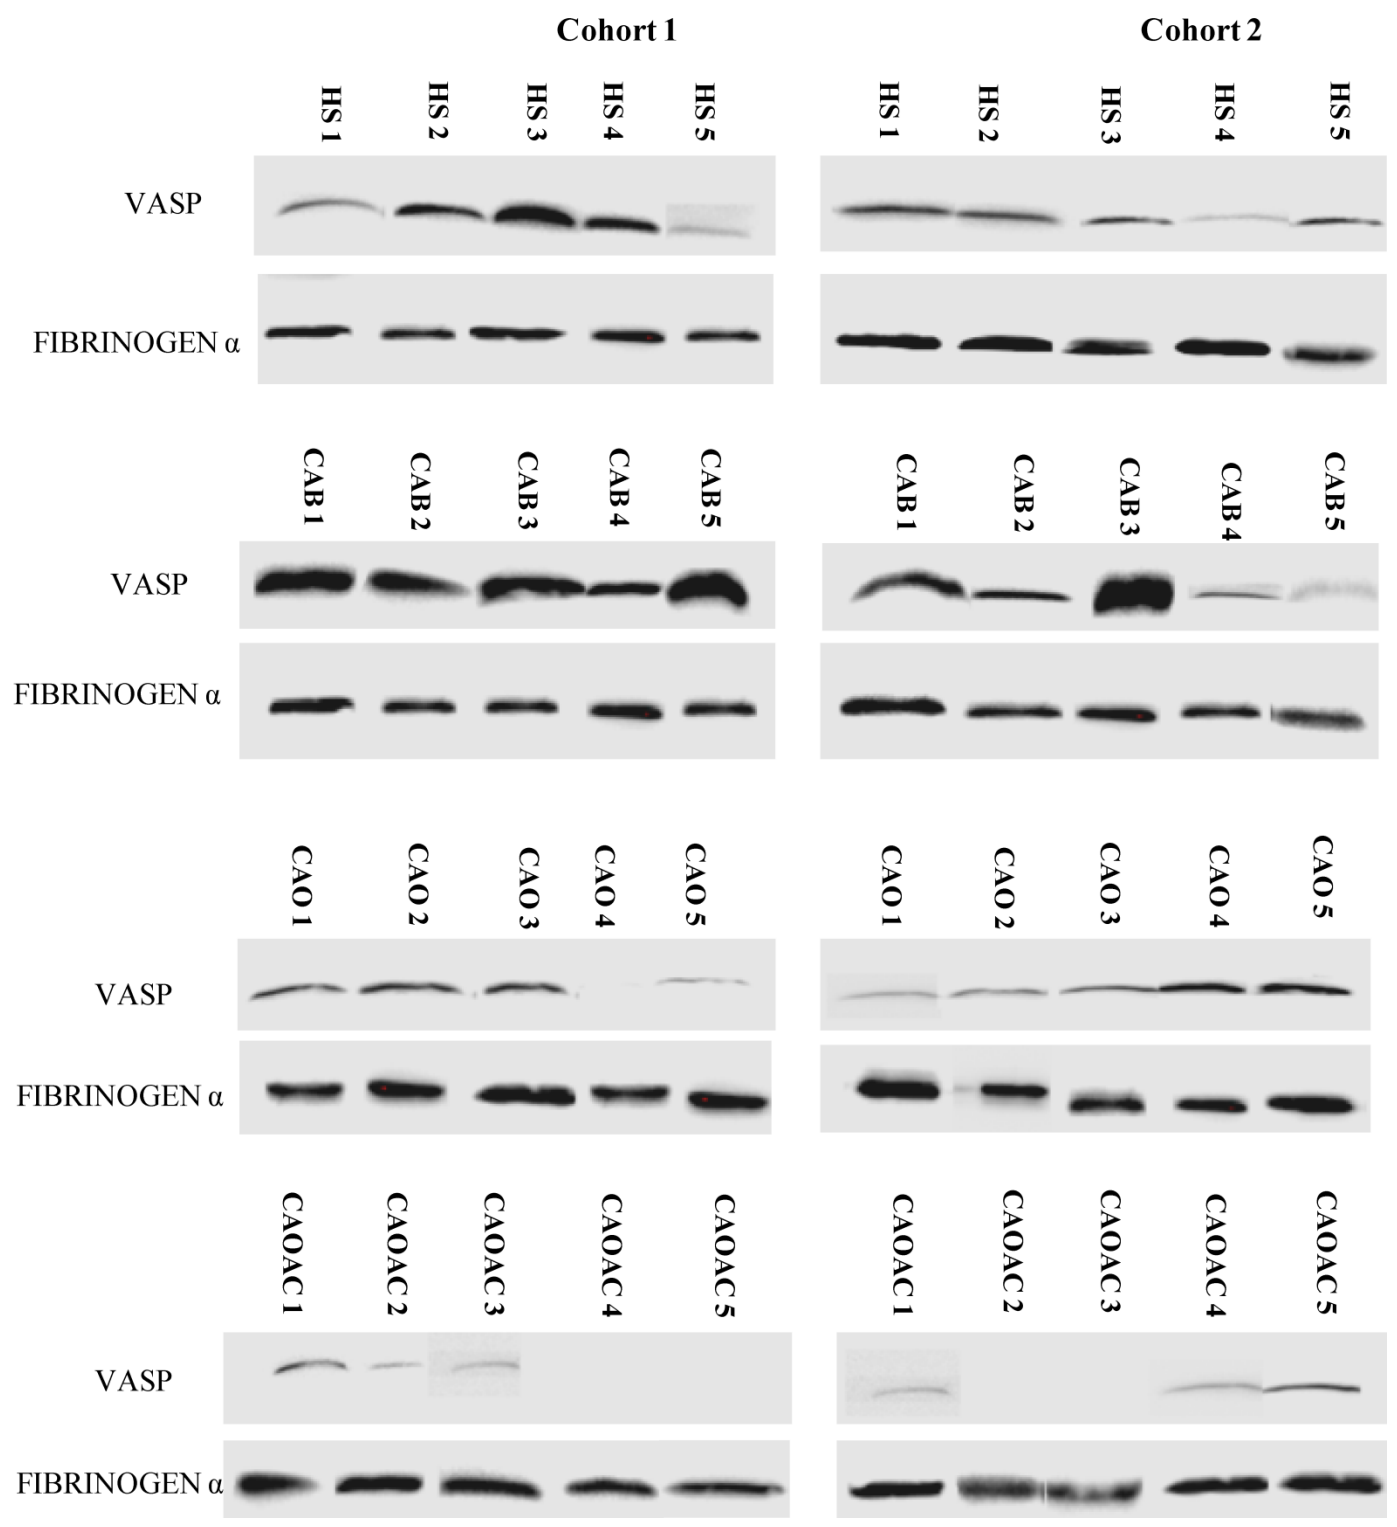

Figure 1D

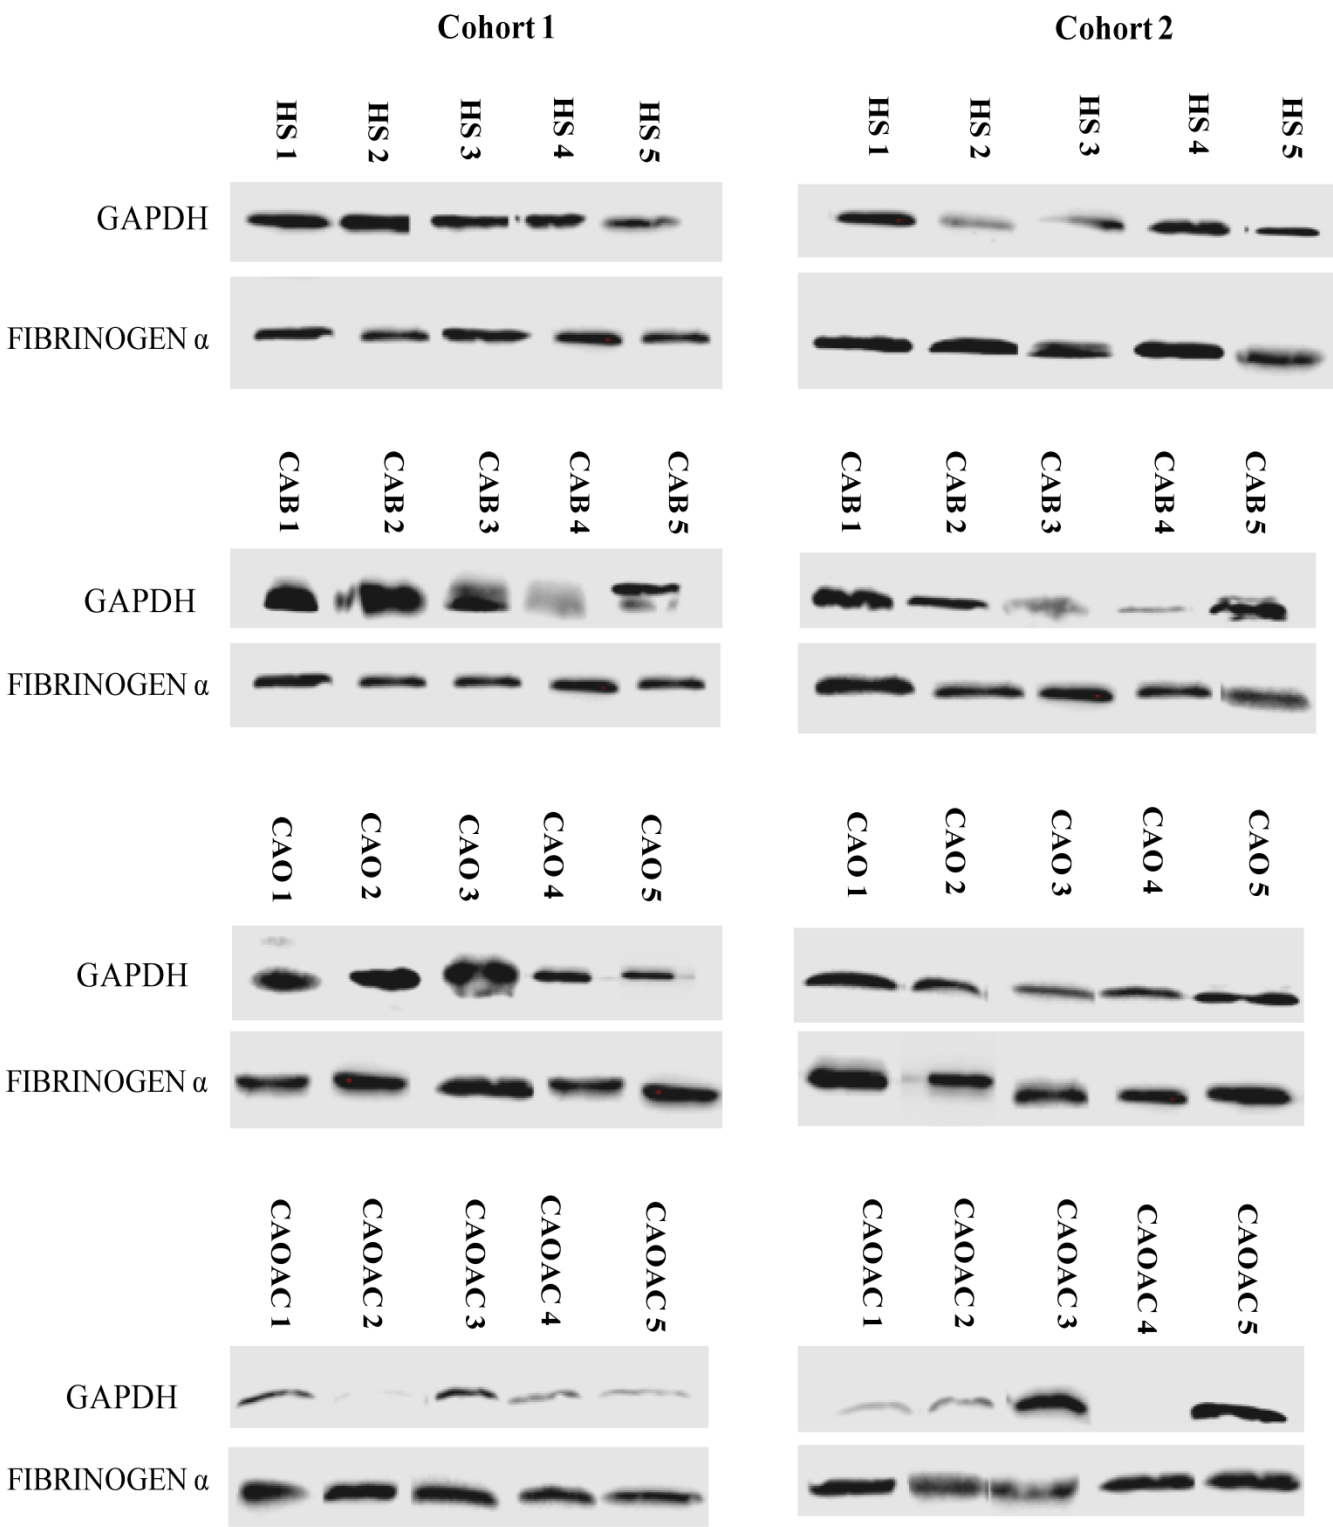

Supplement: FBA2-1-191-s001.pdf [file FBA2-1-191-s001.pdf]
